# Supplementary material for: Optimized De Novo Eriodictyol Biosynthesis in Streptomyces albidoflavus Using an Expansion of the Golden Standard Toolkit for Its Use in Actinomycetes
Source: MDPI journal article supplement (doi:10.3390/ijms24108879), 2023-05-17
Supplement: s1 [file s1]

## Supplementary Figures

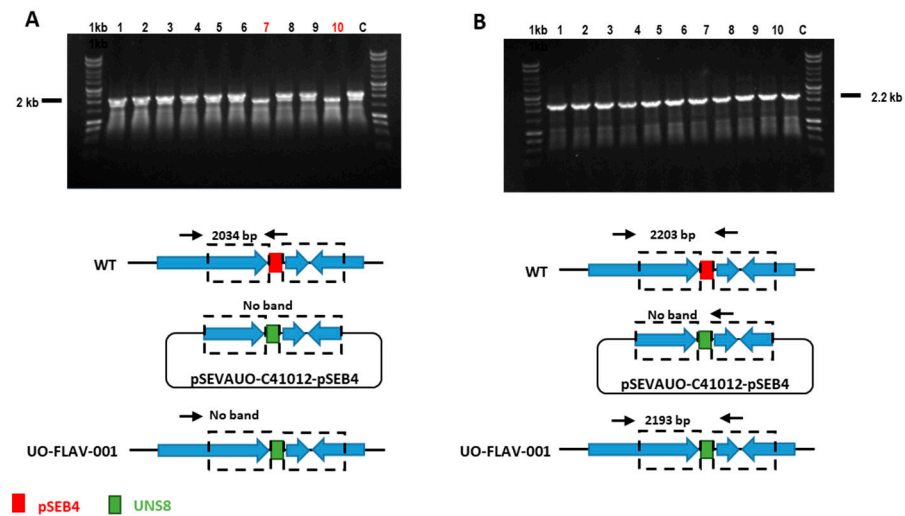

**Figure S1:** Generation of *S. albidoflavus* UO-FLAV-001 strain. A) Agarose gel and graphical representation of PCR verification of *pseB4* replacement by UNS8 with primers pSEB4 del check fw and pSEB4 prot fw. Positive colonies are shown in red. B) Agarose gel and graphical representation of PCR amplification of a genome region containing the desired modification. Primers used were pSEB4 del check fw and pSEB4 del check rev. 1kb: PCR BIO Ladder II, C: *S. albidoflavus* J1074, WT: wild-type.

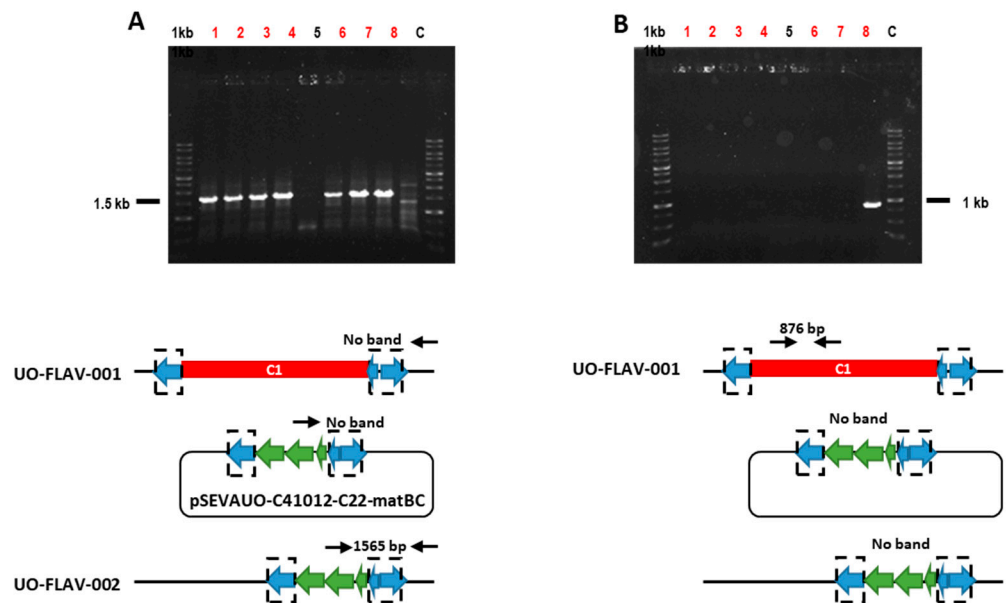

**Figure S2:** Generation of *S. albidoflavus* UO-FLAV-002 strain. A) Agarose gel and graphical representation of PCR verification of C1 replacement by *Perme*\*-*matBC* with primers C1matBC check fw and C1matBC check rev. Positive colonies are shown in red. B) Agarose gel and graphical representation of PCR amplification of a genome region within C1 to check presence of non-edited DNA. Primers used were C1 check fw and C1 check rev. 1kb: PCR BIO Ladder II, C: *S. albidoflavus* UO-FLAV-001.

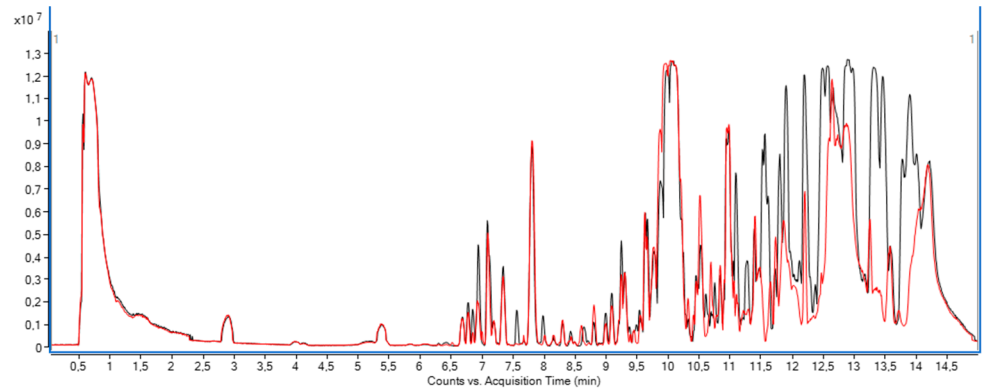

**Figure S3:** LC-HRESIMS base peak chromatograms (BPC) of *S. albidoflavus* WT (black) and *S. albidoflavus* UO-FLAV-002 (red) from cultures in R5A for 144 h. Antimycin peaks are shown.

### Supplementary Tables

**Table S1.** Plasmids used in this work.

| Plasmid                                       | Use in this work                                                         | Reference or source |
|-----------------------------------------------|--------------------------------------------------------------------------|---------------------|
| pCRISPomyces-2                                | Source of <i>pSG5</i> and <i>cas9-sgRNA</i>                              | [1]                 |
| pSG5c                                         | Source of <i>pSG5c</i> with silent point mutations                       | This study          |
| pCas9c                                        | Source of <i>cas9c-sgRNA</i> with silent point mutations                 | This study          |
| PCR <sup>TM</sup> -Blunt II-TOPO <sup>®</sup> | Fragments sub-cloning                                                    | Invitrogen          |
| pSETec                                        | Source of <i>P<sub>ermE</sub>*</i> and <i>oriT-traJ</i>                  | [2]                 |
| pCR-Blunt-cas9c                               | Sub-cloning of <i>cas9c</i>                                              | This study          |
| pCR-Blunt-PermE*-cas9c                        | Source of <i>P<sub>ermE</sub>*-cas9c-sgRNA</i>                           | This study          |
| pSEVA88c1                                     | Source of AmR, pUC and cargo                                             | [3]                 |
| pGM1190                                       | Source of TsrR nucleotide sequence                                       | [4]                 |
| pSEVA181Thio                                  | Source of TsrR                                                           | EXPLORA             |
| pCRBluntTsr                                   | Sub-cloning of TsrR                                                      | This study          |
| pSEVA182                                      | Source of ApR                                                            | [5]                 |
| pCRBluntAp-Tsr                                | Source of ApR-TsrR                                                       | This study          |
| pSEVA23a1                                     | Source of KmR                                                            | [3]                 |
| pSEVA181Hyg                                   | Source of HygR                                                           | EXPLORA             |
| pSEVA181BT1int                                | Source of $\phi$ BT1 integrase                                           | EXPLORA             |
| pSEVAUO-21002                                 | Receptor vector ( <i>pUC-<math>\phi</math>BT1-Am</i> ) for Cargo cloning | This study          |
| pSEVA23g19g1                                  | Source of cargo 1AI2                                                     | [6]                 |
| pSEVA23g19g2                                  | Source of cargo 2AI3                                                     | [6]                 |
| pSEVA23g19g3                                  | Source of cargo 3AI4                                                     | [6]                 |
| pSEVA23g19g4                                  | Source of cargo 4AI5                                                     | [6]                 |
| pSEVA63g19gA                                  | Source of cargo A13B                                                     | [6]                 |
| pSEVA63g19gB                                  | Source of cargo B14C                                                     | [6]                 |
| pSEVA63g19gC                                  | Source of cargo C15D and GmR                                             | [6]                 |
| pSEVA28a1                                     | Source of $\phi$ C31 integrase                                           | [3]                 |
| pPhiC31c                                      | Source of $\phi$ C31 integrase with silent point mutations               | This study          |
| pCRBluntAmR                                   | Sub-cloning of AmR                                                       | This study          |

|                                            |                                                                             |            |
|--------------------------------------------|-----------------------------------------------------------------------------|------------|
| pCRBluntApR-AmR                            | Source of ApR-AmR                                                           | This study |
| pSEVAUO-21003                              | Receptor vector ( <i>pUC-<math>\phi</math>BT1-Ap-Am</i> ) for cargo cloning | This study |
| pCRBluntGm-Tsr                             | Source of GmR-TsrR                                                          | This study |
| pSEVAUO-11001                              | Receptor vector ( <i>pUC-<math>\phi</math>C31-Ap-Am</i> ) for cargo cloning | This study |
| pSEVA181pSAM2                              | Source of pSAM2 integrase                                                   | This study |
| pSEVA88c1-PermE*-Ind-HA                    | Source of HA for <i>P<sub>permE*</sub></i> cloning upstream indigoidine BGC | This study |
| pmatBC                                     | Source of <i>matBC</i>                                                      | EXPLORA    |
| pSEVA28b- <i>P<sub>permE*</sub></i> -APIGC | Source of <i>P<sub>permE*</sub></i> -RBS, <i>TAL</i> and <i>4CL</i>         | [3]        |
| pSEVA181permE                              | Source of <i>P<sub>permE*</sub></i> (Level 0 MoClo)                         | EXPLORA    |
| pSEVA181SF14                               | Source of <i>SF14</i> (Level 0 MoClo)                                       | EXPLORA    |
| pSEVA181SP25                               | Source of <i>SP25</i> (Level 0 MoClo)                                       | EXPLORA    |
| pSEVA181SP43                               | Source of <i>SP43</i> (Level 0 MoClo)                                       | EXPLORA    |
| pSEVA181RiboJ-RBS                          | Source of RiboJ-RBS (Level 0 MoClo)                                         | EXPLORA    |
| pSEVA181TAL                                | Source of <i>TAL</i> cured (Level 0 MoClo)                                  | This study |
| pSEVA1814CL                                | Source of <i>4CL</i> cured (Level 0 MoClo)                                  | This study |
| pSEVA181CHS                                | Source of <i>CHS</i> (Level 0 MoClo)                                        | EXPLORA    |
| pSEVA181CHI                                | Source of <i>CHI</i> (Level 0 MoClo)                                        | EXPLORA    |
| pIDTSMARTttsbib                            | Source of <i>ttsbib</i> (Level 0 MoClo)                                     | IDT        |
| pSEVA181F3H-CPR                            | Source of F3'H-CPR chimaera                                                 | EXPLORA    |
| pCRBluntAm-Tsr                             | Source of AmR-TsrR                                                          | This study |
| pSEVAUO-M21202F3H-CPR                      | Sub-cloning of F3'H-CPR transcription unit                                  | This study |

---

**Table S2.** Strains used in this work.

| Strain                                  | Use in this work                                                                                                           | Reference or source |
|-----------------------------------------|----------------------------------------------------------------------------------------------------------------------------|---------------------|
| <i>Escherichia coli</i> Top10           | Routine sub-cloning and DNA propagation                                                                                    | Invitrogen          |
| <i>Escherichia coli</i> ET12567/pUZ8002 | <i>oriT</i> -containing plasmids delivery to <i>S. albidoflavus</i> through conjugation                                    | [7]                 |
| <i>Streptomyces albidoflavus</i> J1074  | Source of DNA and parental strain for chassis generation and flavonoid production                                          | [8]                 |
| <i>S. albidoflavus</i> M11701           | <i>S. albidoflavus</i> J1074 with plasmid pSE-VAUO-M11701 integrated into $\phi$ C31 site                                  | This study          |
| <i>S. albidoflavus</i> M21703           | <i>S. albidoflavus</i> J1074 with plasmid pSE-VAUO-M21703 integrated into $\phi$ BT1 site                                  | This study          |
| <i>S. albidoflavus</i> M31705           | <i>S. albidoflavus</i> J1074 with plasmid pSE-VAUO-M31705 integrated into pSAM2 site                                       | This study          |
| <i>S. albidoflavus</i> UO-FLAV-001      | <i>S. albidoflavus</i> J1074 with <i>pseB4</i> replaced by UNS8                                                            | This study          |
| <i>S. albidoflavus</i> UO-FLAV-002      | <i>S. albidoflavus</i> UO-FLAV-001 with an-timycin BGC-candicidin BGC-unknown NRPS/PKS BGC replaced by <i>PermE*-matBC</i> | This study          |
| <i>S. albidoflavus</i> WT-NAR           | <i>S. albidoflavus</i> J1074 with naringenin BGC integrated into $\phi$ C31 site                                           | This study          |
| <i>S. albidoflavus</i> WT-ERI           | <i>S. albidoflavus</i> WT-NAR with F3'H-CPR integrated into $\phi$ BT1 site                                                | This study          |
| <i>S. albidoflavus</i> UO-FLAV-002-NAR  | <i>S. albidoflavus</i> UO-FLAV-002 with naringenin BGC integrated into $\phi$ C31 site                                     | This study          |
| <i>S. albidoflavus</i> UO-FLAV-002-ERI  | <i>S. albidoflavus</i> UO-FLAV-002-NAR with F3'H-CPR integrated into $\phi$ BT1 site                                       | This study          |

**Table S3.** Primers used in this study.

| Primer                 | Sequence 5' – 3'                                                          |
|------------------------|---------------------------------------------------------------------------|
| pSG5c F1 fw            | ctgaaggtcctcaatgcactggaaacatcaaggtcgctgTTCCATAGGCTCCGCCC                  |
| pSG5c F1 rev           | CGCCGGAAGGCCAACGAG                                                        |
| pSG5c F2 fw            | ggccagctcctcgtgctggcctcgttgccctccggcgGCCTCGCGGAAAGCAGCTTC                 |
| pSG5c F2 rev           | tgcagctcgccgacggaCTCGCGGACGCCGGGTAC                                       |
| pSG5c F3 fw            | ccgtaccggcgctccgcgagtCCGTCCGCGGCGAGCTGC                                   |
| pSG5c F3 rev           | gaggcggtcaagggtcgggcACCCGGTCACTGCCGGG                                     |
| pSG5c F4 fw            | tcccgagtgagccgggtgCCGCAGCCCTTGAACGCC                                      |
| pSG5c F4 rev           | cgaccttgatgtttccagtgcgattgaggaccttcagtgcgtagcATGCCAGGATCAACAGGAC          |
| cas9c F5 fw            | ttgctgctcctcggtcgACGTGCGTCTACGGGCAC                                       |
| cas9c F2 rev           | atgccctcggtcacgtacttcACCTTGGTCAGCTCGTTG                                   |
| cas9c F3 fw            | acaacgagctaccaaggtgAAGTACGTGACCGAGGGC                                     |
| cas9c F3 rev           | aagccgctgacttcttcggaTCCCAGTCCTTCTTCCGG                                    |
| cas9c F4 fw bis        | cccgaagaaggactgggaTccgaagaagtacggcggc                                     |
| cas9c F4 rev           | aggtgccgtagacgcacgtgCGACCGAAGGAGCAGCAAAAAAAG                              |
| cas9c F2 fw            | ggtggggtaccaggctaacctccgtaggaggacgacaATGGACAAGAAGTACAGCATC                |
| cas9c F5 rev           | ctctaacggacttgagtgggtgttaaaggagttggctTAAAAACGCCCGGCGGC                    |
| CRISPR F1 UNS1 fw bis  | CATTACTCGCATCCATTCTCAGGCTGTCTCGTCTCGTCTCCTTTTCCGCTG-<br>CATAACCC          |
| CRISPR F1 UNS2 rev     | GCTTGGATTCTGCGTTTGTTCGCTCTACGAACTCCCAGCtcatggctctgcccctgg                 |
| CRISPR F2 UNS2 fw      | GCTGGGAGTTCGTAGACGGAAACAAACGCAGAATCCAA-<br>GCGGCCGGCCctacgcgaccgctgtgtcga |
| CRISPR F3 UNS3 fw      | GCACTGAAGGTCCTCAATCGCACTGGAAACATCAAGGTCTGaggccaggaaccg-<br>taaaa          |
| CRISPR F3 UNS4 rev bis | GACTTTGCGTGTTGTCTTACTATTGCTGGCAGGAGGTCAGgg-<br>gacctctgaacaaatccagatg     |
| CRISPR F4 UNS4 fw      | CTGACCTCCTGCCAGCAATAGTAAGACAACACGCAAAGTCCGAG-<br>TGTCCGTTTCGAGTGG         |
| CRISPR F5Apra UNS5 fw  | GAGCCAACTCCCTTTACAACCTCACTCAAGTCCGTTAGAGatttaaatCTCAC-<br>GGTAACT         |
| CRISPR F5Apra UNS1 rev | GAGACGAGACGAGACAGCCTGAGAATGGATGCGAGTAATGgac-<br>cgCgtcTCAGCCAATCGACTG     |
| UNS1 rev               | GAGACGAGACGAGACAGCCTGAGAATG                                               |
| UNS5 fw                | GAGCCAACTCCCTTTACAACCTCACTC                                               |
| cas9 D10A fw           | gaagtacagcatcggtgCcatcgccaccaacagcgtg                                     |
| cas9 D10A rev          | cacgctgttggtgccgatGccaggccgatgctgtacttc                                   |
| UNS2 fw                | GCTGGGAGTTCGTAGACG                                                        |
| UNS3 rev               | CGACCTTGATGTTTCCAG                                                        |
| Cargo UNS5 rev         | ctctaacggacttgagtgggtgttaaaggagttggctcgggacctctgaacaaatccagatg            |
| PhiC31 GA F2 fw        | ccaccaggaaggcgtGtccgccagggaacgtg                                          |
| PhiC31 GA F2 rev       | ccgttccgggtgatctcctCgtctcggaaccagctcg                                     |
| PhiC31 GA F3 fw        | cgagctggttccgagacGaaggagatcaccggaacgg                                     |
| PhiC31 GA F3 rev       | cccaggcgagctggcggtTtcttgccgatCgtctcgccggggtgg                             |
| PhiC31 GA F4 fw        | ggcgagacGatcggcaagaaAaccgccagctccgctggg                                   |
| PhiC31 GA F4 rev       | ctcccagagcagggccagCgtctcctcgtcgccctcg                                     |
| PhiC31 GA F5 fw        | cgaggcgacgaggagacGctggccctgctctgggag                                      |
| PhiC31 GA F5 rev       | cacgaacaggccacgaaCaccgcttgctgtccacg                                       |
| PhiC31 GA F6 fw        | cgtggacgacaagcgggtGtctgtggcctgttcgtg                                      |

|                       |                                                                        |
|-----------------------|------------------------------------------------------------------------|
| PhiC31 GA F1 rev      | cacgttgccttggeggaaCacgccttctgggtgg                                     |
| PhiC31 GA F1 fw       | CGACCTTGATGTTTCCAGTGCGATTGAGGACCTTCAG-<br>TGCGCTAGCcttcagacgtggcagatg  |
| PhiC31 GA F6 rev      | GCTGGGAGTTCGTAGACGGAAACAAACGCAGAATCCAA-<br>GCGGCCGGCCtcacgcegccagtcctc |
| Ind Prot fw           | ACGCatcgtgcgaggtgaactcat                                               |
| Ind Prot rev          | AAACatgagttcacctcgacgat                                                |
| Vector fw             | AAGCTTGCGGCCGCGTCG                                                     |
| Vector rev            | CCTAGGCGGCCTCCTGTG                                                     |
| Ind CRISPR F1 fw      | gtcgccagggttttccagtcacgacggcgcaagctttcatggtgccggcatc                   |
| Ind CRISPR F1 rev     | ATCCTCCCCGCACCTCTCGCCAGCCGTCAA-<br>GATCGACTCCgcggtggtcgccctgttg        |
| Ind CRISPR F2 fw      | TGTGGGCACAATCGTGCCGTTGGTAGGATCTAGCGTACTccatgagttcacctcg-<br>cac        |
| Ind CRISPR F2 rev     | attaaagcggataacaatttcacacaggaggccgctaggaactccagcacctcgacg              |
| pSEB4 prot fw         | ACGCGAGAGCCGTACGTCTCGCCC                                               |
| pSEB4 prot rev        | AAACGGGCGAGACGTACGGCTCTC                                               |
| pSEB4 F1 UNS7 fw      | CAAGACGCTGGCTCTGACATTTCCGCTACTGAACTACTCGCCTCGCAG-<br>TACGACGTGG        |
| pSEB4 F1 UNS8 rev     | CCAGGTGGTTGATGGGTTGATTGCTTTGGTTGAGACGAGGGTCTCCGTC-<br>TACCCCCGC        |
| pSEB4 F2 UNS8 fw      | CCTCGTCTCAACCAAAGCAATCAACCCATCAACCACCTGGTT-<br>GTCGGTCCCGTCCCT         |
| pSEB4 F2 UNS6 rev     | TATGTGACCGTAGAGTATTCTTAGGTGGCAGCGAACGAGTGTCGG-<br>TATCCATCGGCG         |
| pSEVA-CRISPR UNS7 rev | CGAGTAGTTCAGTAGCGGAAATGTCAGAGCCAGCGTCTT-<br>GAGGCATCAAATAAAACGA        |
| CRISPR F1 UNS1 fw bis | CATTACTCGCATCCATTCTCAGGCTGTCTCGTCTCGTCTCCTTTTCCGCTG-<br>CATAACCC       |
| pSEVA-CRISPR UNS6 fw  | CTCGTTCGCTGCCACCTAAGAATACTCTACGGTCACATACCTT-<br>GGACTCCTGTTGATA        |
| C1 F2 fw              | CACTCGAACGGACACTCGTGGGCGGTCTCCTTGAGGTC                                 |
| C1 F2 rev             | GTCGCCAGGGTTTTCCAGTCACGACGCGGCCGCAA-<br>GCTTCAGACTCCGCCGGGAGAC         |
| matBC rev             | GGGACCTCAAGGAGACCGCCACGAGTGTCGGTTCGAG                                  |
| cas9c F1 rev          | TGTCGTCTCTACGGGAG                                                      |
| matBC BglII GA fw     | ccggttgtaggaggacgaagatctcaggaggcagacaaatgtc                            |
| matBC fw              | ACGCGCTGGTCTTGCCGTCCATATGTTTTTACACCAGGCC                               |
| C1 F1 fw              | attaaagcggataacaatttcacacaggaggccgctaggaactggtgcacggcg                 |
| C1 F1 rev             | CCTGGTGTAaaaaCATATGgacggcaaggaccagcgc                                  |
| TAL GA F1 fw          | GCGGCCGCGCGAATTTCGAGCTCGGTACCCggtctcaAATGATGACCCTCCAG-<br>TCCCAGAC     |
| TAL GA F1 rev         | GTCCTGGGCGGGGTGGTCcTCGGGGCGGAGGTTCGGC                                  |
| TAL GA F2 fw          | GCCGACCTCCGCCCCGAgGACCACCCGCCCAGGAC                                    |
| TAL GA F2 rev         | GAAGCCGGAAGTGGAGGCCcGCCTGGCCACCGTGGAGG                                 |
| TAL GA F3 fw          | CCTCCACGGTGGCCAGGCgGGCCTCCAGTCCGGCTTC                                  |
| TAL GA F3 rev         | GCTGAGGGAAGTGGACGGAGACgGGGGTGGCGTTTCGCGCG                              |
| TAL GA F4 fw          | CGCGCGAACGCCACCCCcGTCCTCCGTCCAGTCCCTCAGC                               |
| TAL GA F4 rev         | TGCCTGCAGGTCGACTCTAGAGGATCCCCggtctcaAAGCtaggcggggggggtcgg              |
| pSEVA181 fw           | GGGGATCCTCTAGAGTCG                                                     |
| pSEVA181 rev          | GGGTACCGAGCTCGAATT                                                     |
| 4CL GA F1 fw          | GCGGCCGCGCGAATTTCGAGCTCGGTACCCggtctcaAATGatgttcgggtcggagtacg           |
| 4CL GA F1 rev         | gtcgcccttgcgacgccCgtctccgacgtgcggc                                     |

|                     |                                                           |
|---------------------|-----------------------------------------------------------|
| 4CL GA F2 fw        | gccgcactggcggagacGggcgtgcgcaagggcgac                      |
| 4CL GA F2 rev       | TGCCTGCAGGTCGACTCTAGAGGATCCCCggtctcaAAGCtcagcggggctcgggag |
| Prot seq rev        | caaatccagatggagtaa                                        |
| pSEB4 del check fw  | AGCTGGACCAACGCCACC                                        |
| pSEB4 del check rev | CGGCTCCACGTCGACCAC                                        |
| C1matBC check fw    | catctcccgcagctcctcc                                       |
| C1matBC check rev   | tggtgtcgatgcggatgaac                                      |
| C1 check fw         | atgcgcctggacctgaac                                        |
| C1 check rev        | TCACAGCCTGACATGGGTG                                       |
| PermE fw            | TCGATCTTGACGGCTGGC                                        |
| PermE Ind check rev | caggaccccgagcatgtg                                        |

---
